# Supplementary material for: The Canine Oral Microbiome
Source: PLoS One. 2012 Apr 27;7(4):e36067. doi: 10.1371/journal.pone.0036067 (PMC3338629; doi:10.1371/journal.pone.0036067)
Supplement: Table S4 — Rank abundance of clones in canine oral taxa. (XLS) [file pone.0036067.s004.xls]

## Sheet: Sheet1
		Table S4. Rank Abundance
Rank	Genus	Species	COT	Clones	Abundance (%)
1	Porphyromonas	gingivicanis	022	313	5.25344
2	Proteocatella	sp.	007	310	5.20309
3	Synergistales [G-1]	sp.	178	258	4.33031
4	Porphyromonas	cangingivalis	109	203	3.40718
5	Porphyromonas	gulae	052	184	3.08828
6	Treponema	denticola	197	133	2.23229
7	Peptococcus	sp.	044	113	1.89661
8	Clostridiales [F-1,G-2]	sp.	028	105	1.76234
9	Peptostreptococcus	sp.	033	101	1.6952
10	Filifactor	villosus	031	100	1.67842
T-11	Bergeyella	zoohelcum	186	97	1.62806
T-11	Pasteurellaceae [G-2]	sp.	080	97	1.62806
13	Proteocatella	sp.	032	96	1.61128
T-14	Helcococcus	sp.	069	94	1.57771
T-14	Moraxella	sp.	018	94	1.57771
16	Peptostreptococcaceae XI [G-1]	sp.	005	93	1.56093
T-17	Desulfomicrobium	orale	008	78	1.30916
T-17	Moraxella	sp.	017	78	1.30916
T-19	Lachnospiraceae XIVa [G-5]	sp.	024	77	1.29238
T-19	Synergistales [G-1]	sp.	180	77	1.29238
21	Brachymonas	sp.	015	76	1.2756
T-22	Fusobacterium	sp.	189	74	1.24203
T-22	Synergistales [G-2]	sp.	138	74	1.24203
24	Granulicatella	sp.	095	72	1.20846
25	Porphyromonas	canoris	108	68	1.14132
26	Peptostreptococcaceae XIII [G-2]	sp.	077	67	1.12454
27	Peptostreptococcaceae XI [G-4]	sp.	019	66	1.10775
28	Filifactor	alocis	001	65	1.09097
29	Fusobacterium	sp.	169	59	0.990265
30	Peptostreptococcaceae XI [G-4]	sp.	021	57	0.956697
31	Campylobacter	sp.	011	51	0.855992
32	Neisseria	shayeganii	090	47	0.788855
T-33	Peptostreptococcaceae XI [G-1]	sp.	004	45	0.755287
T-33	Peptostreptococcaceae XI [G-1]	sp.	071	45	0.755287
35	Clostridiales IV [G-1]	sp.	061	44	0.738503
36	Parvimonas	sp.	035	42	0.704935
37	Peptostreptococcaceae XI [G-2]	sp.	047	36	0.60423
T-38	Catonella	sp.	158	34	0.570661
T-38	Peptostreptococcaceae XI [G-3]	sp.	034	34	0.570661
T-40	Clostridiales [F-1,G-2]	sp.	127	33	0.553877
T-40	Lachnospiraceae XIVa [G-6]	sp.	073	33	0.553877
T-40	Peptostreptococcaceae XI [G-5]	sp.	096	33	0.553877
T-40	Tissierella	sp.	029	33	0.553877
44	Synergistales [G-1]	sp.	179	32	0.537093
T-45	Bacteroidia [G-5]	sp.	187	31	0.520309
T-45	Peptostreptococcaceae XI [G-1]	sp.	135	31	0.520309
T-47	Lachnospiraceae XIVa [G-4]	sp.	099	30	0.503525
T-47	Peptostreptococcaceae XI [G-3]	sp.	104	30	0.503525
T-47	Peptostreptococcaceae XI [G-5]	sp.	168	30	0.503525
T-47	Synergistales [G-1]	sp.	244	30	0.503525
T-47	Treponema	sp.	233	30	0.503525
T-52	Peptostreptococcaceae XI [G-10]	sp.	125	28	0.469956
T-52	Treponema	sp.	207	28	0.469956
T-54	Bacteroides	sp.	040	27	0.453172
T-54	Tannerella	forsythus	023	27	0.453172
T-56	Gemella	palaticanis	089	26	0.436388
T-56	Pasteurellaceae [G-2]	sp.	271	26	0.436388
T-58	Neisseria	animaloris	016	25	0.419604
T-58	Pasteurella	dogmatis	092	25	0.419604
T-58	Peptostreptococcaceae XIII [G-1]	sp.	030	25	0.419604
T-61	Aquaspirillum	sp.	091	24	0.40282
T-61	Capnocytophaga	cynodegmi	254	24	0.40282
T-63	Conchiformibius	steedae	280	23	0.386036
T-63	Treponema	sp.	201	23	0.386036
T-65	Bacteroides	tectus	039	22	0.369251
T-65	Peptostreptococcaceae XI [G-1]	sp.	006	22	0.369251
T-67	Chlorobi [G-1]	sp.	046	21	0.352467
T-67	Clostridiales [F-2,G-1]	sp.	100	21	0.352467
T-69	Dialister	invisus	043	20	0.335683
T-69	Erysipelotrichaceae [G-1]	sp.	311	20	0.335683
T-69	Treponema	sp.	200	20	0.335683
T-72	Parvimonas	sp.	101	19	0.318899
T-72	Porphyromonas	crevioricanis	253	19	0.318899
T-74	Catonella	sp.	025	18	0.302115
T-74	Globicatella	sp.	107	18	0.302115
T-74	Treponema	sp.	198	18	0.302115
T-74	Treponema	sp.	249	18	0.302115
T-78	Clostridiales [F-1,G-1]	sp.	027	17	0.285331
T-78	Lachnospiraceae XIVa [G-2]	sp.	156	17	0.285331
T-78	Streptococcus	minor	116	17	0.285331
T-81	Lachnospiraceae XIVa [G-3]	sp.	036	16	0.268546
T-81	Neisseria	weaveri	269	16	0.268546
T-81	Odoribacter	denticanis	084	16	0.268546
T-81	Peptostreptococcaceae XI [G-4]	sp.	065	16	0.268546
T-81	Peptostreptococcaceae XI [G-10]	sp.	066	16	0.268546
T-81	Porphyromonas	macacae	192	16	0.268546
T-81	Treponema	sp.	359	16	0.268546
T-88	Cardiobacterium	sp.	238	15	0.251762
T-88	Catonella	sp.	257	15	0.251762
T-88	Conchiformibius	sp.	289	15	0.251762
T-88	'Eubacterium' XI	nodatum	045	15	0.251762
T-88	Peptostreptococcaceae XI [G-1]	sp.	057	15	0.251762
T-88	Porphyromonas	sp.	290	15	0.251762
T-88	Schwartzia	sp.	042	15	0.251762
T-88	Treponema	socranskii	088	15	0.251762
T-88	Treponema	sp.	170	15	0.251762
T-97	Clostridiales [F-1,G-2]	sp.	038	14	0.234978
T-97	Lachnospiraceae XIVa [G-6]	sp.	161	14	0.234978
T-97	Schwartzia	sp.	063	14	0.234978
T-100	Fusobacterium	canifelinum	188	13	0.218194
T-100	Lachnospiraceae XIVa [G-2]	sp.	062	13	0.218194
T-100	Lachnospiraceae XIVa [G-6]	sp.	106	13	0.218194
T-100	Lautropia	sp.	175	13	0.218194
T-100	Prevotella	sp.	226	13	0.218194
T-100	Streptococcus	sp.	279	13	0.218194
T-106	Abiotrophia	sp.	229	12	0.20141
T-106	Capnocytophaga	canimorsus I	235	12	0.20141
T-106	Treponema	sp.	350	12	0.20141
T-109	Cardiobacterium	sp.	177	11	0.184626
T-109	Desulfovibrionales [G-1]	sp.	009	11	0.184626
T-109	Dialister	pneumosintes	118	11	0.184626
T-109	Lachnospiraceae XIVa [G-6]	sp.	026	11	0.184626
T-109	Parvimonas	sp.	102	11	0.184626
T-109	Peptostreptococcaceae XI [G-12]	sp.	124	11	0.184626
T-109	Treponema	sp.	199	11	0.184626
T-116	Clostridiales [F-1,G-1]	sp.	141	10	0.167842
T-116	Ottowia	sp.	014	10	0.167842
T-116	Synergistales [G-1]	sp.	094	10	0.167842
T-116	Synergistales [G-1]	sp.	203	10	0.167842
T-120	Campylobacter	sp.	283	9	0.151057
T-120	Helcococcus	sp.	140	9	0.151057
T-120	Peptostreptococcaceae XI [G-1]	sp.	086	9	0.151057
T-120	Peptostreptococcaceae XIII [G-3]	sp.	332	9	0.151057
T-120	Synergistales [G-1]	sp.	231	9	0.151057
T-120	Xenophilus	sp.	264	9	0.151057
T-126	Bacteroides	sp.	183	8	0.134273
T-126	Campylobacter	rectus	010	8	0.134273
T-126	Desulfovibrio	sp.	070	8	0.134273
T-126	Filifactor	sp.	064	8	0.134273
T-126	Filifactor	sp.	164	8	0.134273
T-126	Peptostreptococcaceae XI [G-2]	sp.	003	8	0.134273
T-126	Peptostreptococcaceae XI [G-3]	sp.	287	8	0.134273
T-126	Peptostreptococcaceae XI [G-11]	sp.	068	8	0.134273
T-126	Porphyromonadaceae [G-1]	sp.	184	8	0.134273
T-126	Spirochaeta	sp.	314	8	0.134273
T-126	SR1 [G-1]	sp.	369	8	0.134273
T-126	Wolinella	sp.	173	8	0.134273
T-138	Aggregatibacter	segnis	093	7	0.117489
T-138	Catonella	sp.	160	7	0.117489
T-138	Leptotrichia	sp.	345	7	0.117489
T-138	Pasteurellaceae [G-1]	sp.	272	7	0.117489
T-138	Pasteurellaceae [G-1]	sp.	326	7	0.117489
T-138	Peptostreptococcaceae XI [G-1]	sp.	258	7	0.117489
T-138	Peptostreptococcaceae XI [G-7]	sp.	155	7	0.117489
T-138	Synergistales [G-1]	sp.	242	7	0.117489
T-138	Synergistales [G-1]	sp.	390	7	0.117489
T-147	Comamonas	sp.	270	6	0.100705
T-147	Desulfobulbus	sp.	078	6	0.100705
T-147	Fusobacterium	necrophorum	190	6	0.100705
T-147	GN02 [G-2]	sp.	291	6	0.100705
T-147	Peptostreptococcaceae XI [G-3]	sp.	051	6	0.100705
T-147	Peptostreptococcaceae XI [G-6]	sp.	067	6	0.100705
T-147	Porphyromonas	sp.	239	6	0.100705
T-147	Porphyromonas	sp.	341	6	0.100705
T-147	Propionibacterium	sp.	300	6	0.100705
T-147	TM7 [G-1]	sp.	237	6	0.100705
T-147	Treponema	sp.	087	6	0.100705
T-147	Treponema	sp.	246	6	0.100705
T-159	Chlorobi [G-1]	sp.	312	5	0.0839208
T-159	Erysipelotrichaceae [G-4]	sp.	381	5	0.0839208
T-159	Proteocatella	sp.	058	5	0.0839208
T-159	Pasteurella	canis	273	5	0.0839208
T-159	Synergistales [G-1]	sp.	205	5	0.0839208
T-159	Synergistales [G-1]	sp.	243	5	0.0839208
T-159	TM7 [G-1]	sp.	305	5	0.0839208
T-159	Treponema	sp.	351	5	0.0839208
T-159	Treponema	sp.	356	5	0.0839208
T-159	Treponema	sp.	358	5	0.0839208
T-169	Blautia	sp.	143	4	0.0671366
T-169	Clostridiales [F-1,G-4]	sp.	142	4	0.0671366
T-169	Clostridiales [F-1,G-4]	sp.	157	4	0.0671366
T-169	Fusobacterium	sp.	236	4	0.0671366
T-169	Lachnospiraceae XIVa [G-6]	sp.	263	4	0.0671366
T-169	Moraxella	sp.	396	4	0.0671366
T-169	Peptostreptococcaceae XI [G-1]	sp.	129	4	0.0671366
T-169	Peptostreptococcaceae XI [G-1]	sp.	166	4	0.0671366
T-169	Peptostreptococcaceae XI [G-3]	sp.	105	4	0.0671366
T-169	Peptostreptococcus	sp.	227	4	0.0671366
T-169	Phascolarctobacterium	sp.	212	4	0.0671366
T-169	Porphyromonas	sp.	181	4	0.0671366
T-169	Stenotrophomonas	sp.	224	4	0.0671366
T-169	Treponema	sp.	357	4	0.0671366
T-169	Veillonellaceae IX [G-1]	sp.	079	4	0.0671366
T-169	Veillonellaceae IX [G-1]	sp.	211	4	0.0671366
T-169	Xenophilus	sp.	174	4	0.0671366
T-186	Acholeplasmatales [G-1]	sp.	256	3	0.0503525
T-186	Capnocytophaga	sp.	339	3	0.0503525
T-186	Catonella	sp.	228	3	0.0503525
T-186	Conchiformibius	sp.	286	3	0.0503525
T-186	Eikonella	sp.	049	3	0.0503525
T-186	Erysipelotrichaceae [G-2]	sp.	255	3	0.0503525
T-186	Lactobacillus	animalis	153	3	0.0503525
T-186	Spirochaetales [G-1]	sp.	373	3	0.0503525
T-186	Leptotrichia	sp.	294	3	0.0503525
T-186	Neisseria	canis	137	3	0.0503525
T-186	Neisseria	zoodegmatis	349	3	0.0503525
T-186	Parvimonas	micra	076	3	0.0503525
T-186	Peptostreptococcaceae XI [G-7]	sp.	110	3	0.0503525
T-186	SR1 [G-2]	sp.	382	3	0.0503525
T-186	TM7 [G-2]	sp.	251	3	0.0503525
T-186	Treponema	sp.	208	3	0.0503525
T-186	Treponema	sp.	209	3	0.0503525
T-203	Acholeplasmatales [G-4]	sp.	316	2	0.0335683
T-203	Actinomyces	sp.	252	2	0.0335683
T-203	Anaeroglobus	geminatus	119	2	0.0335683
T-203	Arcobacter	sp.	276	2	0.0335683
T-203	Bergeyella	sp.	318	2	0.0335683
T-203	Capnocytophaga	sp.	295	2	0.0335683
T-203	Cardiobacterium	sp.	176	2	0.0335683
T-203	Catonella	sp.	048	2	0.0335683
T-203	Catonella	sp.	098	2	0.0335683
T-203	Catonella	sp.	340	2	0.0335683
T-203	Chloroflexi [G-1]	sp.	306	2	0.0335683
T-203	Clostridiales [F-1,G-3]	sp.	386	2	0.0335683
T-203	Clostridiales [F-1,G-5]	sp.	162	2	0.0335683
T-203	Clostridiales [F-1,G-6]	sp.	260	2	0.0335683
T-203	Clostridiales [F-2,G-1]	sp.	225	2	0.0335683
T-203	Clostridiales [F-2,G-2]	sp.	123	2	0.0335683
T-203	Erysipelotrichaceae [G-3]	sp.	302	2	0.0335683
T-203	'Eubacterium' XI	infirmum	111	2	0.0335683
T-203	Filifactor	sp.	163	2	0.0335683
T-203	Firmicutes [G-1]	sp.	309	2	0.0335683
T-203	GN02 [G-1]	sp.	323	2	0.0335683
T-203	GN02 [G-1]	sp.	364	2	0.0335683
T-203	Janthinobacterium	lividum	103	2	0.0335683
T-203	Lachnospiraceae XIVa [G-7]	sp.	399	2	0.0335683
T-203	Lautropia	sp.	060	2	0.0335683
T-203	Leptotrichia	sp.	319	2	0.0335683
T-203	Leucobacter	sp.	288	2	0.0335683
T-203	Luteimonas	sp.	275	2	0.0335683
T-203	Mogibacterium	diversum	343	2	0.0335683
T-203	Mogibacterium	timidum	112	2	0.0335683
T-203	Mycoplasma	canis	313	2	0.0335683
T-203	Neisseria	sp.	268	2	0.0335683
T-203	Peptococcus	sp.	334	2	0.0335683
T-203	Peptococcus	sp.	344	2	0.0335683
T-203	Peptoniphilus	sp.	304	2	0.0335683
T-203	Peptostreptococcaceae XI [G-11]	sp.	074	2	0.0335683
T-203	Peptostreptococcaceae XI [G-6]	sp.	333	2	0.0335683
T-203	Peptostreptococcaceae XI [G-8]	sp.	126	2	0.0335683
T-203	Peptostreptococcaceae XI [G-8]	sp.	139	2	0.0335683
T-203	Peptostreptococcaceae XI [G-9]	sp.	097	2	0.0335683
T-203	Porphyromonas	sp.	366	2	0.0335683
T-203	Prevotella	sp.	195	2	0.0335683
T-203	Prevotella	sp.	298	2	0.0335683
T-203	Propionibacterium	sp.	321	2	0.0335683
T-203	Proprionivibrio	sp.	223	2	0.0335683
T-203	Selenomonas	noxia	121	2	0.0335683
T-203	Selenomonas	sp.	167	2	0.0335683
T-203	Selenomonas	sputigena	342	2	0.0335683
T-203	Shuttleworthia	satelles	114	2	0.0335683
T-203	Sporocytophaga	myxococcoides	185	2	0.0335683
T-203	SR1 [G-1]	sp.	380	2	0.0335683
T-203	Streptococcus	lutetiensis	152	2	0.0335683
T-203	Synergistales [G-1]	sp.	204	2	0.0335683
T-203	TM7 [G-1]	sp.	308	2	0.0335683
T-203	TM7 [G-1]	sp.	322	2	0.0335683
T-203	Treponema	amylovorum	191	2	0.0335683
T-203	Treponema	medium	232	2	0.0335683
T-203	Treponema	sp.	247	2	0.0335683
T-203	Treponema	sp.	325	2	0.0335683
T-203	Treponema	sp.	378	2	0.0335683
T-203	Treponema	sp.	395	2	0.0335683
T-203	Treponema	vincentii	354	2	0.0335683
T-265	Acholeplasmatales [G-2]	sp.	172	1	0.0167842
T-265	Acholeplasmatales [G-3]	sp.	375	1	0.0167842
T-265	Actinobacteria [G-1]	sp.	376	1	0.0167842
T-265	Actinomyces	sp.	083	1	0.0167842
T-265	Actinomyces	sp.	374	1	0.0167842
T-265	Aerococcus	viridans	331	1	0.0167842
T-265	Alphaproteobacteria [G-1]	sp.	081	1	0.0167842
T-265	Bacteroides	heparinolyticus	310	1	0.0167842
T-265	Bacteroidia [G-2]	sp.	301	1	0.0167842
T-265	Bacteroidia [G-3]	sp.	041	1	0.0167842
T-265	Bacteroidia [G-4]	sp.	387	1	0.0167842
T-265	Blautia	gnavus	145	1	0.0167842
T-265	Blautia	hansenii	144	1	0.0167842
T-265	Blautia	sp.	337	1	0.0167842
T-265	Butyrivibrio	sp.	113	1	0.0167842
T-265	Capnocytophaga	canimorsus II	362	1	0.0167842
T-265	Capnocytophaga	sp.	329	1	0.0167842
T-265	Chondromyces	sp.	128	1	0.0167842
T-265	Cloacibacterium	sp.	320	1	0.0167842
T-265	Clostridiales [F-1,G-2]	sp.	222	1	0.0167842
T-265	Clostridiales [F-2,G-1]	sp.	230	1	0.0167842
T-265	Clostridiales [F-2,G-3]	sp.	259	1	0.0167842
T-265	Clostridiales III [G-1]	sp.	216	1	0.0167842
T-265	Clostridiales III [G-1]	sp.	261	1	0.0167842
T-265	Clostridiales III [G-2]	sp.	082	1	0.0167842
T-265	Clostridiales III [G-2]	sp.	336	1	0.0167842
T-265	Clostridiales III [G-3]	sp.	388	1	0.0167842
T-265	Clostridiales IV [G-1]	sp.	219	1	0.0167842
T-265	Clostridiales IV [G-2]	sp.	217	1	0.0167842
T-265	Clostridiales IV [G-3]	sp.	085	1	0.0167842
T-265	'Clostridium' XI	hiranonis	148	1	0.0167842
T-265	Deltaproteobacteria [G-1]	sp.	266	1	0.0167842
T-265	Eikenella	corrodens	115	1	0.0167842
T-265	Enterococcus	cecorum	150	1	0.0167842
T-265	Erysipelotrichaceae [G-3]	sp.	317	1	0.0167842
T-265	Eschericheria	coli	277	1	0.0167842
T-265	Faecalibacterium	sp.	147	1	0.0167842
T-265	Fusobacterium	nucleatum ss animalis	367	1	0.0167842
T-265	Globicatella	sp.	218	1	0.0167842
T-265	GN02 [G-2]	sp.	394	1	0.0167842
T-265	Jeotgalicoccus	halotolerans	347	1	0.0167842
T-265	Lachnospiraceae XIVa [G-7]	sp.	037	1	0.0167842
T-265	Lachnospiraceae XIVa [G-1]	sp.	146	1	0.0167842
T-265	Lachnospiraceae XIVa [G-1]	sp.	346	1	0.0167842
T-265	Lachnospiraceae XIVa [G-1]	sp.	371	1	0.0167842
T-265	Lachnospiraceae XIVa [G-5]	sp.	136	1	0.0167842
T-265	Lactobacillus	reuteri	151	1	0.0167842
T-265	Leucobacter	sp.	292	1	0.0167842
T-265	Moraxella	sp.	328	1	0.0167842
T-265	Paludibacter	sp.	384	1	0.0167842
T-265	Pasteurella	multocida	274	1	0.0167842
T-265	Pelistega	sp.	267	1	0.0167842
T-265	Peptostreptococcaceae XI [G-3]	sp.	307	1	0.0167842
T-265	Peptostreptococcaceae XI [G-7]	sp.	221	1	0.0167842
T-265	Peptostreptococcaceae XI [G-8]	sp.	303	1	0.0167842
T-265	Phascolarctobacterium	sp.	149	1	0.0167842
T-265	Porphyromonas	sp.	182	1	0.0167842
T-265	Porphyromonas	sp.	281	1	0.0167842
T-265	Porphyromonas	sp.	361	1	0.0167842
T-265	Prevotella	sp.	282	1	0.0167842
T-265	Prevotella	sp.	284	1	0.0167842
T-265	Prevotella	sp.	372	1	0.0167842
T-265	Propionibacterium	sp.	296	1	0.0167842
T-265	Propionibacterium	sp.	324	1	0.0167842
T-265	Propionibacterium	sp.	365	1	0.0167842
T-265	Proteiniphilum	sp.	385	1	0.0167842
T-265	Pseudoclavibacter	sp.	392	1	0.0167842
T-265	Schwartzia	sp.	130	1	0.0167842
T-265	Schwartzia	sp.	213	1	0.0167842
T-265	Schwartzia	sp.	389	1	0.0167842
T-265	Selenomonas	sp.	120	1	0.0167842
T-265	Spirochaeta	sp.	379	1	0.0167842
T-265	Streptobacillus	sp.	370	1	0.0167842
T-265	Streptococcus	anginosus	117	1	0.0167842
T-265	Streptococcus	mitis bv 2	330	1	0.0167842
T-265	Streptococcus	pneumoniae	348	1	0.0167842
T-265	Streptococcus	sp.	297	1	0.0167842
T-265	Streptococcus	suis	278	1	0.0167842
T-265	TM7 [G-1]	sp.	250	1	0.0167842
T-265	TM7 [G-2]	sp.	363	1	0.0167842
T-265	Treponema	maltophilum	353	1	0.0167842
T-265	Treponema	parvum	210	1	0.0167842
T-265	Treponema	sp.	171	1	0.0167842
T-265	Treponema	sp.	293	1	0.0167842
T-265	Treponema	sp.	352	1	0.0167842
T-265	Treponema	sp.	355	1	0.0167842
T-265	Treponema	sp.	397	1	0.0167842
T-265	Ureaplasma	sp.	315	1	0.0167842
T-265	WPS-2 [G-1]	sp.	220	1	0.0167842
